# Supplementary material
Source: PubMed Central journal article supplement (PMC1768090)
Supplement: heart_90_3_347__1.pdf [file heart_90_3_347__1.pdf]

## Web-only References

- w1. Viitasalo M, Halonen L, Partinen M, *et al.* Sleep and cardiac rhythm in healthy men. *Ann Med* 1991;**23**:135–9.
- w2. Kantelip JP, Sage E, Duchene-Marullaz P. Findings on ambulatory electrocardiographic monitoring in subjects older than 80 years. *Am J Cardiol* 1986;**57**:398–401.
- w3. Burgess HJ, Trinder J, Kim Y. Cardiac autonomic nervous system activity during presleep wakefulness and stage 2 NREM sleep. *J Sleep Res* 1999;**8**:113–22.
- w4. Burgess HJ, Trinder J, Kim Y, *et al.* Sleep and circadian influences on cardiac autonomic nervous system activity. *Am J Physiol* 1997;**273**:H1761–H1768.
- w5. Lown B, Tykocinski M, Garfein A, *et al.* Sleep and ventricular premature beats. *Circulation* 1973;**48**:691–701.
- w6. Pitzalis MV, Mastropasqua F, Massari F, *et al.* Sleep suppression of ventricular arrhythmias: a predictor of beta-blocker efficacy. *Eur Heart J* 1996;**17**:917–25.
- w7. Kong TQ Jr, Goldberger JJ, Parker M, *et al.* Circadian variation in human ventricular refractoriness. *Circulation* 1995;**92**:1507–16.
- w8. Willich SN, Goldberg RJ, Maclure M, *et al.* Increased onset of sudden cardiac death in the first three hours after awakening. *Am J Cardiol* 1992;**70**:65–8.
- w9. Lown B. The Mikamo lecture. Role of higher nervous activity in sudden cardiac death. *Jpn Circ J* 1990;**54**:581–602.
- w10. Matsuo K, Akahoshi M, Nakashima E, *et al.* The prevalence, incidence and prognostic value of the Brugada-type electrocardiogram: a population-based study of four decades. *J Am Coll Cardiol* 2001;**38**:765–70.
- w11. Maislin G, Pack AI, Kribbs NB, *et al.* A survey screen for prediction of apnea. *Sleep* 1995;**18**:158–66.
- w12. Kushida CA, Efron B, Guilleminault C. A predictive morphometric model for the obstructive sleep apnea syndrome. *Ann Intern Med* 1997;**127**:581–7.
- w13. Koehler U, Becker HF, Grimm W, *et al.* Relations among hypoxemia, sleep stage, and bradyarrhythmia during obstructive sleep apnea. *Am Heart J* 2000;**139**:142–8.
- w14. Shepard JW Jr, Garrison MW, Grither DA, *et al.* Relationship of ventricular ectopy to oxyhemoglobin desaturation in patients with obstructive sleep apnea. *Chest* 1985;**88**:335–40.
- w15. Fries R, Bauer D, Heisel A, *et al.* Clinical significance of sleep-related breathing disorders in patients with implantable cardioverter defibrillators. *Pacing Clin Electrophysiol* 1999;**22**:223–7.
- w16. Sanner BM, Zidek W, Laschewski F, *et al.* Prevalence of ventricular late potentials in patients with obstructive sleep apnea syndrome. *Clin Cardiol* 1999;**22**:219–24.
- w17. Koehler U, Fus E, Grimm W, *et al.* Heart block in patients with obstructive sleep apnoea: pathogenetic factors and effects of treatment. *Eur Respir J* 1998;**11**:434–9.
- w18. Kato I, Shiomi T, Sasanabe R, *et al.* Effects of physiological cardiac pacing on sleep-disordered breathing in patients with chronic bradydysrhythmias. *Psychiatry Clin Neurosci* 2001;**55**:257–8.
- w19. Schwartz PJ, Montemerlo M, Facchini M, *et al.* The QT interval throughout the first 6 months of life: a prospective study. *Circulation* 1982;**66**:496–501.

- w20. Schwartz PJ, Priori SG, Dumaine R, *et al.* A molecular link between the sudden infant death syndrome and the long-QT syndrome. *N Engl J Med* 2000;**343**:262–7.
- w21. Ackerman MJ, Siu BL, Sturner WQ, *et al.* Postmortem molecular analysis of SCN5A defects in sudden infant death syndrome. *JAMA* 2001;**286**:2264–9.
- w22. Schwartz PJ, Priori SG, Bloise R, *et al.* Molecular diagnosis in a child with sudden infant death syndrome. *Lancet* 2001;**358**:1342–3.
- w23. Naughton MT, Bradley TD. Sleep apnea in congestive heart failure. *Clin Chest Med* 1998;**19**:99–113.
